# Supplementary material for: The deployment length of solar radiation modification: an interplay of mitigation, net-negative emissions and climate uncertainty
Source: Copernicus journal article supplement (doi:10.5194/esd-14-367-2023), 2023-03-28
Supplement: Supplementary file 1 [file esd-14-367-2023-supplement.pdf]

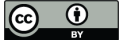

*Supplement of*

## **The deployment length of solar radiation modification: an interplay of mitigation, net-negative emissions and climate uncertainty**

**Susanne Baur et al.**

*Correspondence to:* Susanne Baur ([susanne.baur@cerfacs.fr](mailto:susanne.baur@cerfacs.fr))

The copyright of individual parts of the supplement might differ from the article licence.

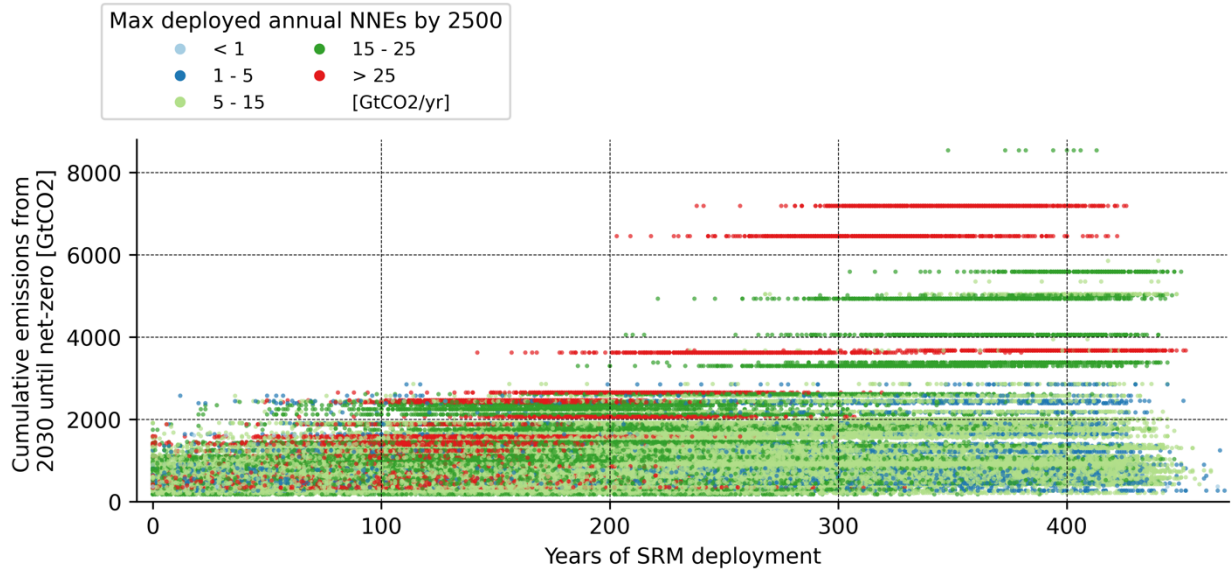

Figure S01: Relationship between cumulative CO<sub>2</sub> emissions from net-zero CO<sub>2</sub> until reattaining 1.5°C and SRM deployment length. Colour-coding according to maximum annual NNEs that would be reached by the year 2500 in GtCO<sub>2</sub>/yr.

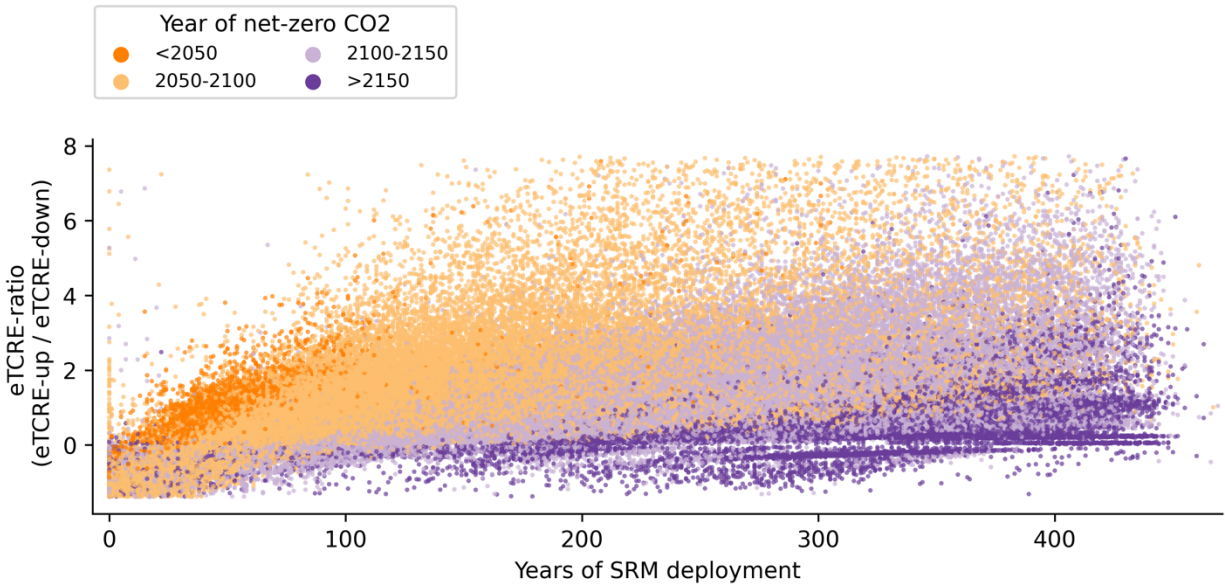

Figure S02: Relationship between eTCRE-ratio and SRM deployment length. Colour-coding according to the year of reaching net-zero CO<sub>2</sub>. Plot shows data points that fall in the 1-99th percentile range.

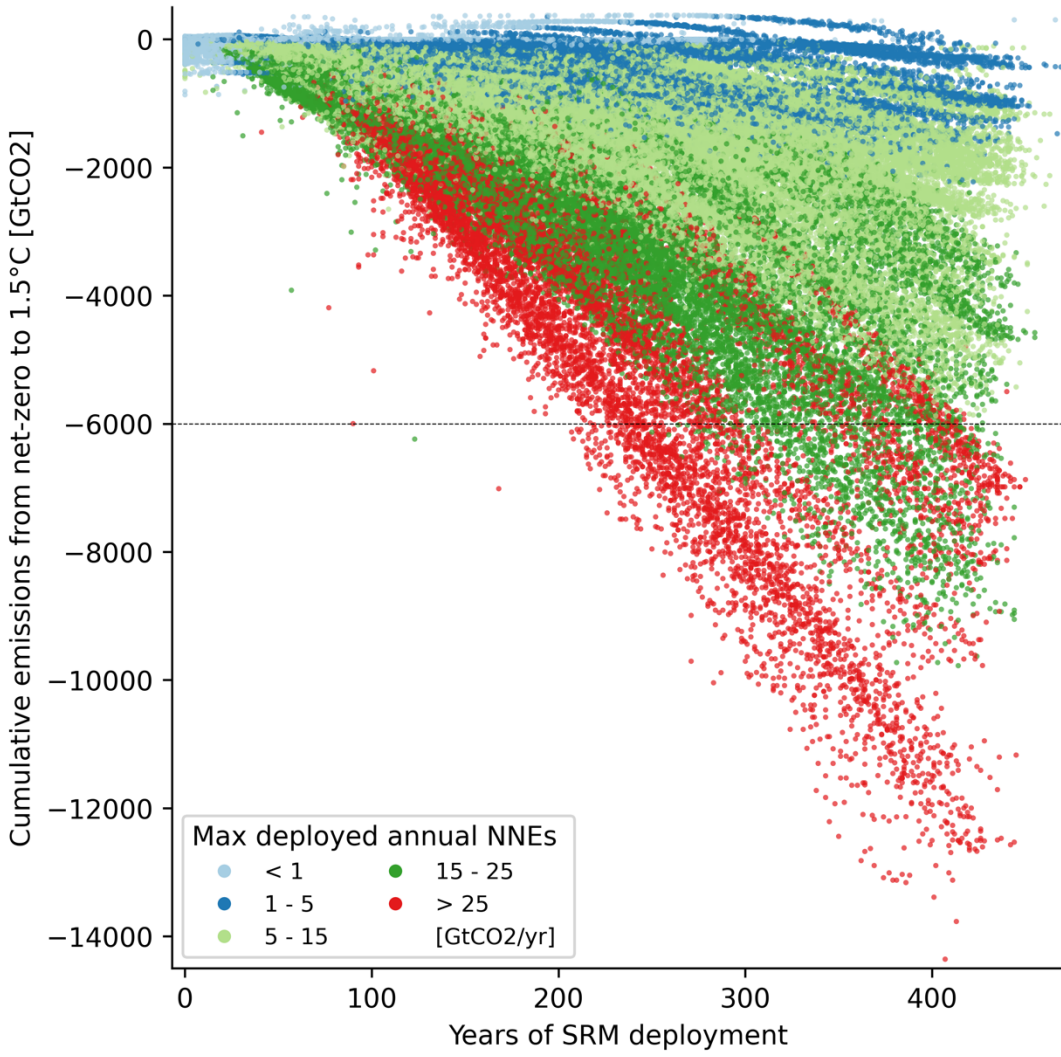

Figure S03: Relationship between cumulative CO2 emissions from net-zero CO2 until reattaining 1.5°C and SRM deployment length. Colour-coded by the maximum deployed annual NNEs.

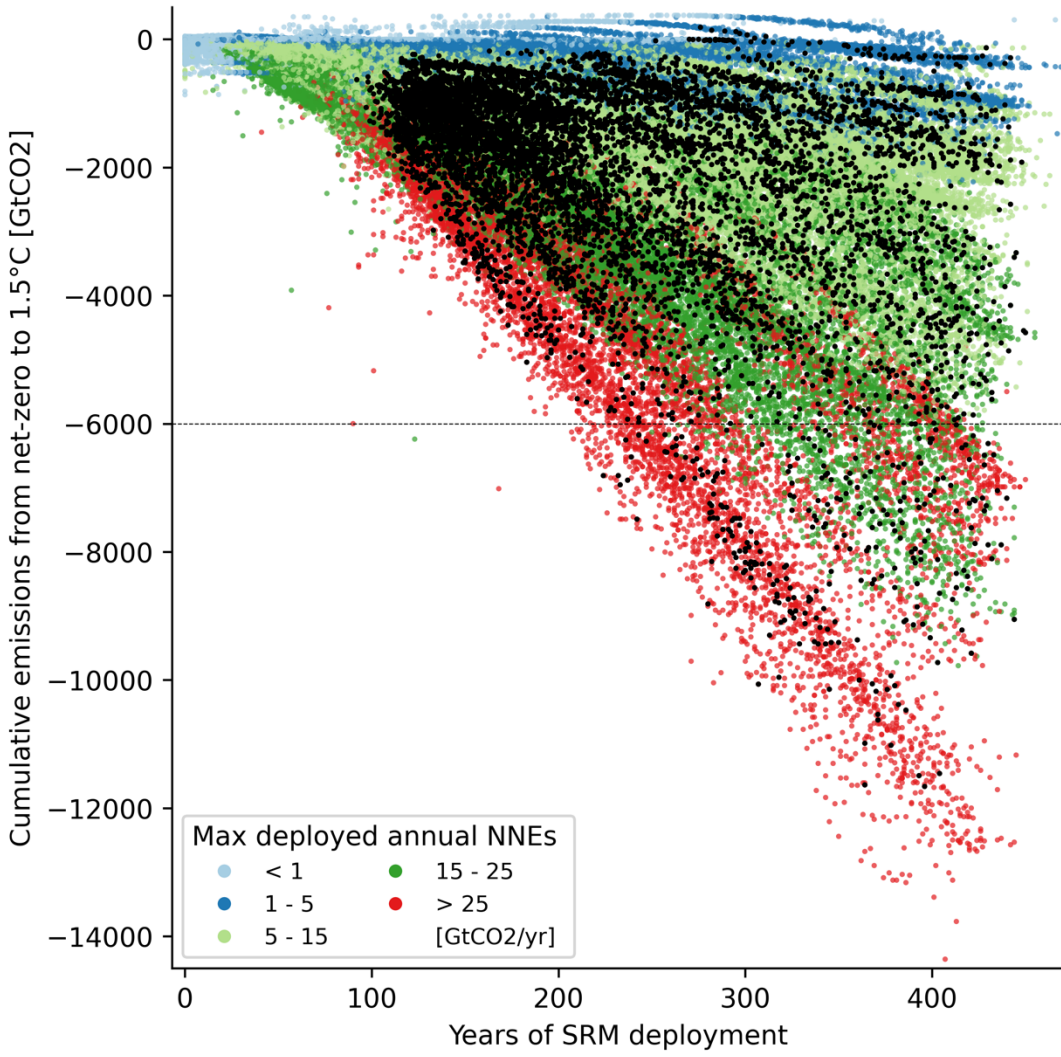

Figure S04: Relationship between cumulative CO<sub>2</sub> emissions from net-zero CO<sub>2</sub> until reattaining 1.5°C and SRM deployment length. Colour-coded by the maximum deployed annual NNEs. Black dots represent realisations that follow current NDC median 2100-warming projections (2.4°C).
